# Supplementary material for: Characterization of the Ocular Surface Microbiome in Keratitis Patients after Repeated Ophthalmic Antibiotic Exposure
Source: PubMed Central journal article supplement (PMC9045205; doi:10.1128/spectrum.02162-21), 2022-04-04
Supplement: spectrum02162-21_supp_1_seq14.pdf [file spectrum02162-21_supp_1_seq14.pdf]

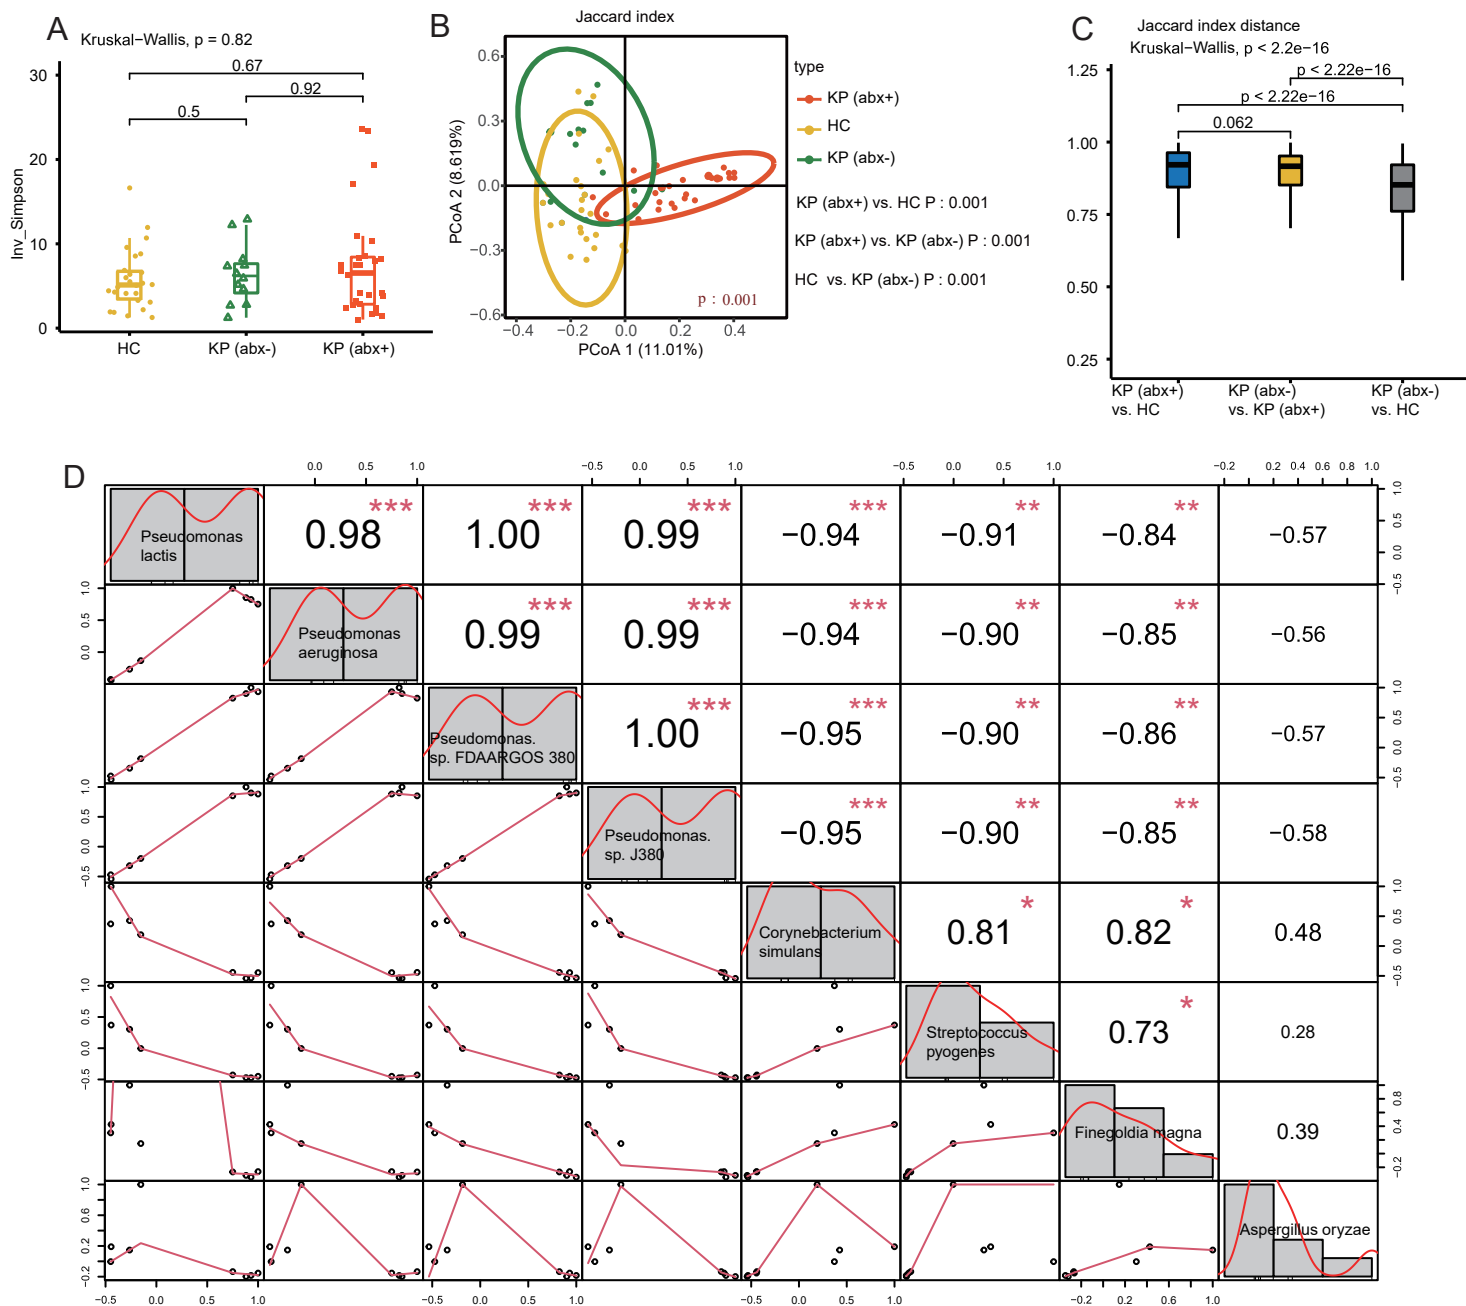

Fig. S1 (A) Simpson indexes of the three groups (HC group, KP (abx+) group, and KP (abx-) group) were compared at the species levels. (B) PCoA plot of Jaccard distances for subjects among the three groups. PERMANOVA, non-parametric permutational multivariate analysis of variance. (C) Between-group Jaccard distance comparisons among HC group, KP (abx+) group, and KP (abx-) group. (D) Pairwise Spearman's correlation analyses among eight different species. Significance level (\* $P < 0.05$ ; \*\* $P < 0.01$ ; \*\*\* $P < 0.001$ ). The P-values from the Kruskal-Wallis test comparing the significance of three groups and the Wilcox test comparing two groups are shown.

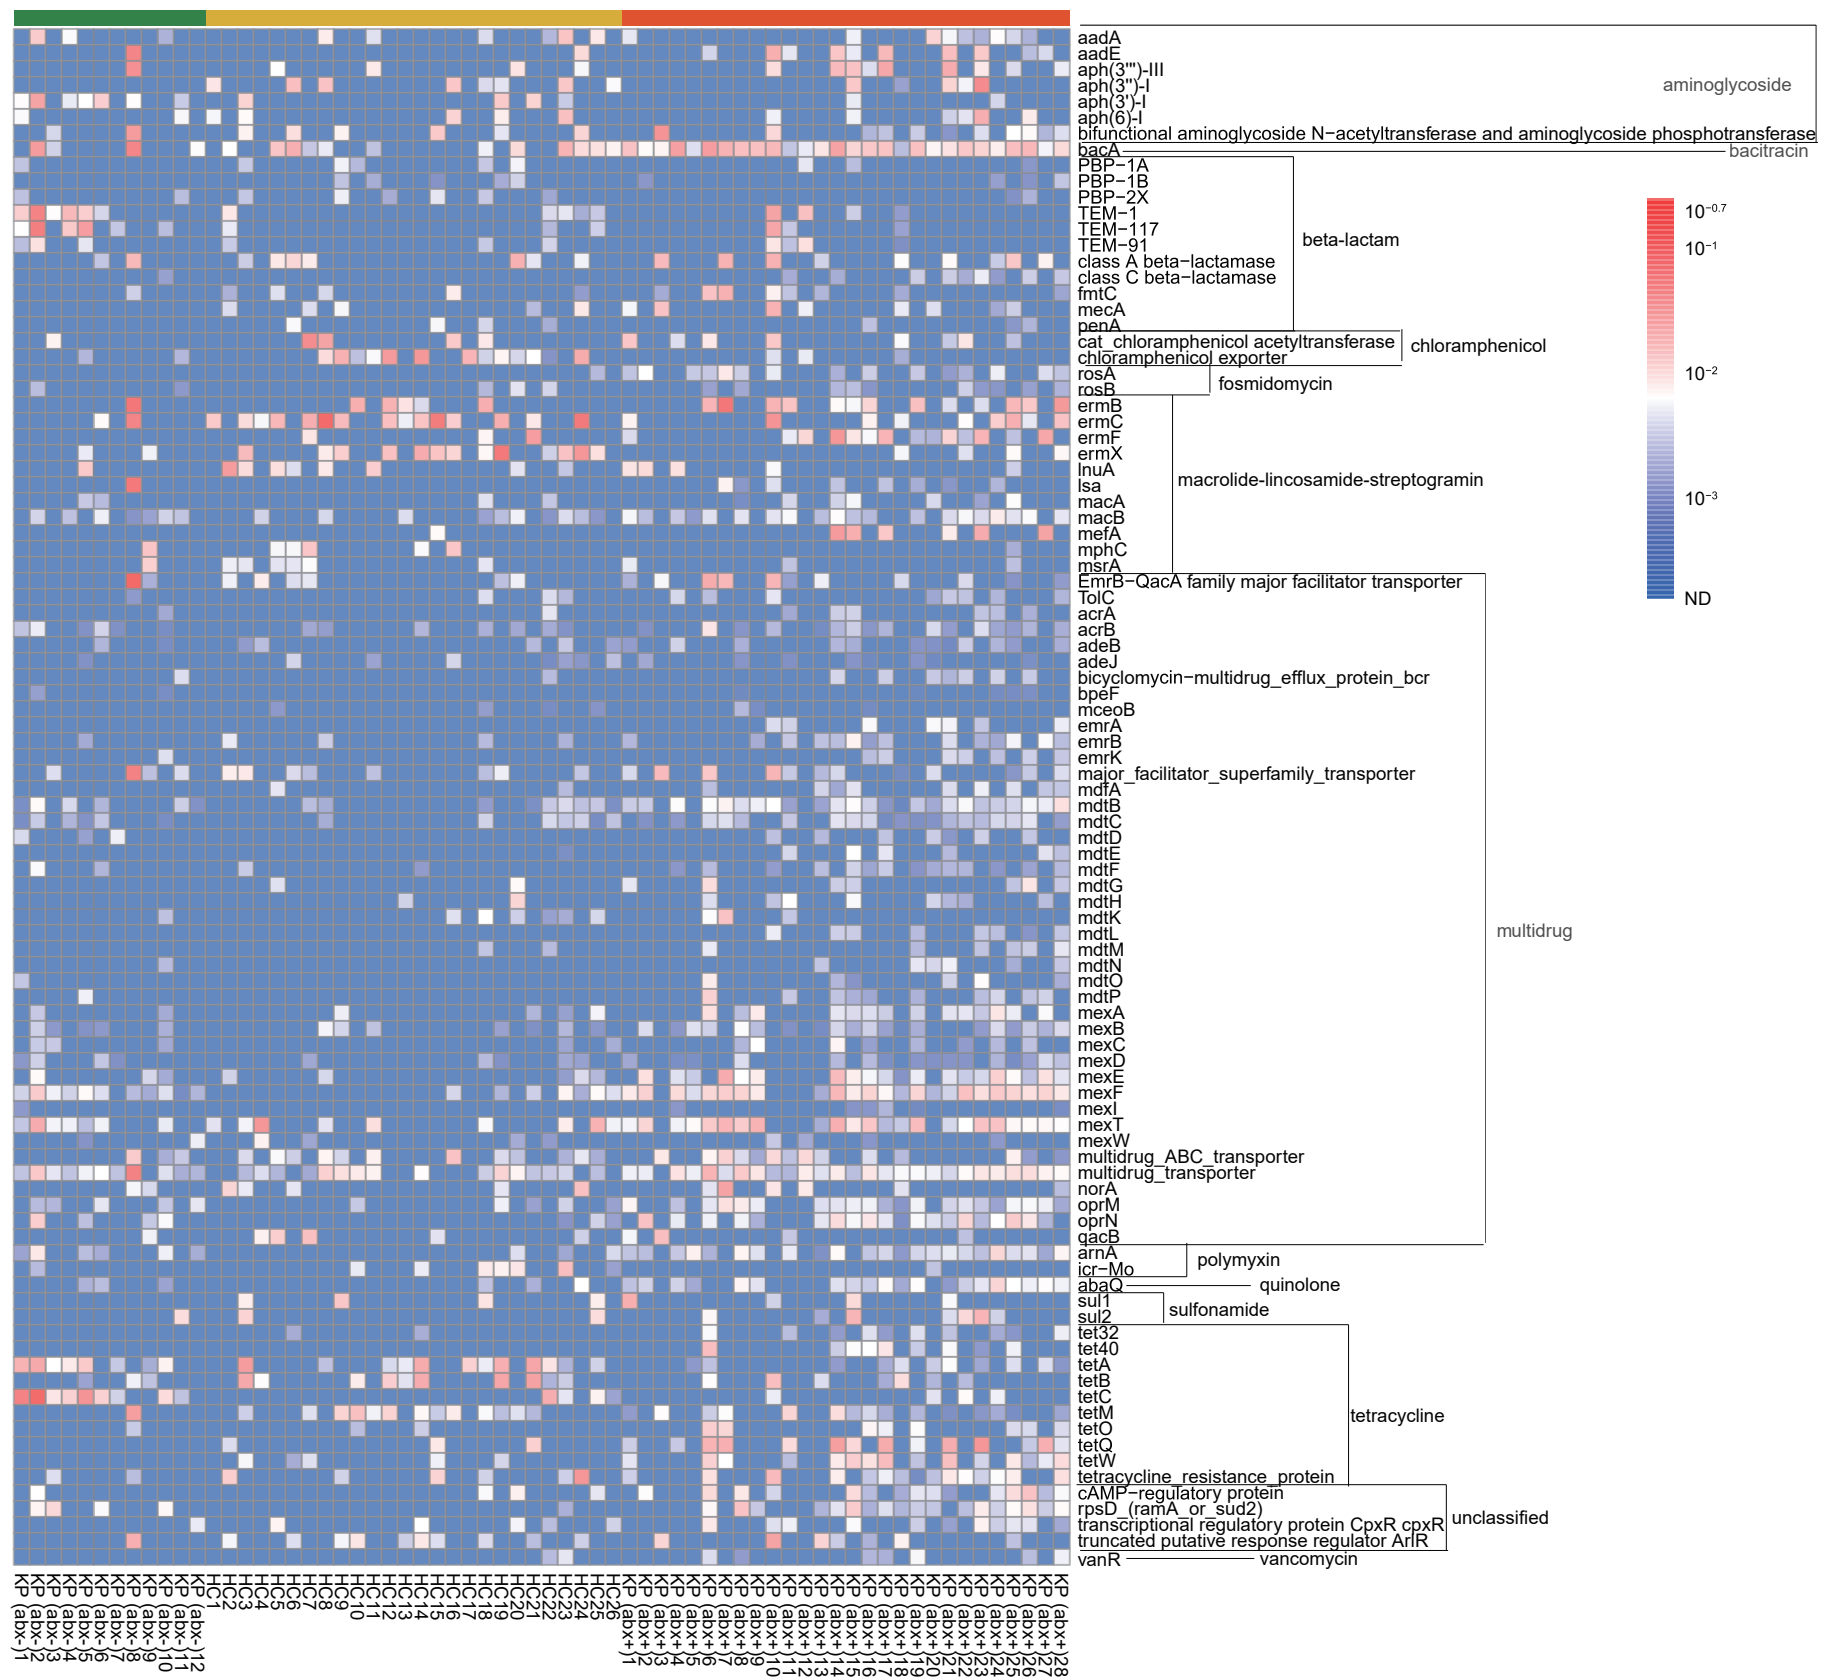

Fig. S2 Abundance of 96 ARG subtypes present in at least 10% of samples (copy/16S rRNA).

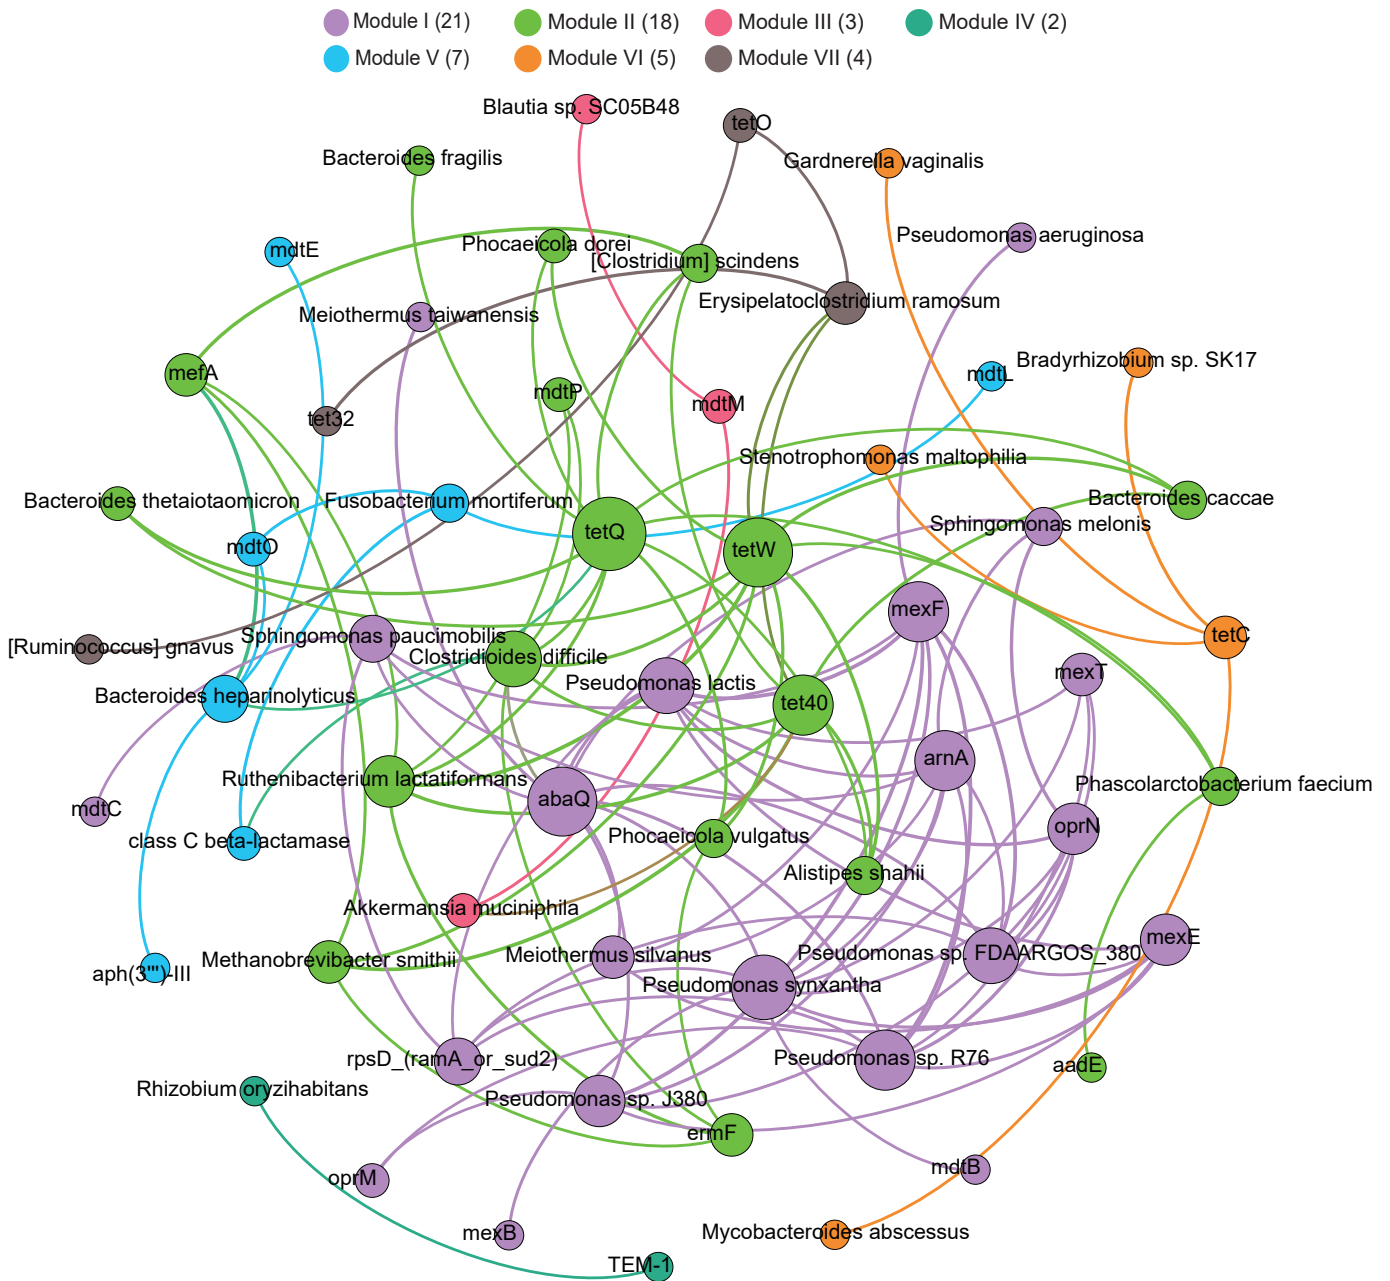

Fig. S3 Network analysis showing the co-occurrence pattern between ARGs subtypes and microbial taxa based on Spearman's correlation analysis. A connection represents strong and significant (FDR adjusted, P-value < 0.01, Spearman's  $r > 0.6$ ) correlation. The size of each node is proportional to the number of connections. The nodes were colored according to the modularity class.

**Table S1** Potential ARG hosts information revealed by co-occurrence between ARG subtypes and microbial taxa.

| Species                        | Genus                  | ARG subtype                                                             | ARG type                                                                                     |
|--------------------------------|------------------------|-------------------------------------------------------------------------|----------------------------------------------------------------------------------------------|
| Akkermansia muciniphila        | Akkermansia            | mdtM<br>tet40                                                           | multidrug<br>tetracycline                                                                    |
| Alistipes shahii               | Alistipes              | tet40<br>tetQ<br>tetW                                                   | tetracycline<br>tetracycline<br>tetracycline                                                 |
| Bacteroides caccae             | Bacteroides            | tet40<br>tetQ<br>tetW                                                   | tetracycline<br>tetracycline<br>tetracycline                                                 |
| Bacteroides fragilis           | Bacteroides            | tetQ                                                                    | tetracycline                                                                                 |
| Bacteroides heparinolyticus    | Bacteroides            | aph(3''')-III<br>mefA<br>metE<br>mdtO<br>tetQ                           | aminoglycoside<br>MLS<br>MLS<br>multidrug<br>tetracycline                                    |
| Bacteroides thetaiotaomicron   | Bacteroides            | tetQ<br>tetW                                                            | tetracycline<br>tetracycline                                                                 |
| Blautia sp. SC05B48            | Blautia                | mdtM                                                                    |                                                                                              |
| Bradyrhizobium sp. SK17        | Bradyrhizobium         | tetC                                                                    | tetracycline                                                                                 |
| Clostridioides difficile       | Clostridioides         | class C beta-lactamase<br>ermF<br>mdtP<br>abaQ<br>tet40<br>tetQ<br>tetW | beta-lactam<br>MLS<br>multidrug<br>quinolone<br>tetracycline<br>tetracycline<br>tetracycline |
| [Clostridium] scindens         | Lachnoclostridium      | mefA<br>tet40<br>tetQ                                                   | MLS<br>tetracycline<br>tetracycline                                                          |
| Erysipelatoclostridium ramosum | Erysipelatoclostridium | tet32<br>tet40<br>tetO<br>tetW                                          | tetracycline<br>tetracycline<br>tetracycline<br>tetracycline                                 |
| Fusobacterium mortiferum       | Fusobacterium          | class C beta-lactamase<br>mdtL<br>mdtO                                  | beta-lactam<br>multidrug<br>multidrug                                                        |
| Gardnerella vaginalis          | Gardnerella            | tetC                                                                    | tetracycline                                                                                 |
| Meiothermus silvanus           | Meiothermus            | mexE<br>mexF<br>arnA<br>abaQ                                            | multidrug<br>multidrug<br>polymyxin<br>quinolone                                             |
| Meiothermus taiwanensis        | Meiothermus            | abaQ                                                                    | quinolone                                                                                    |
| Methanobrevibacter smithii     | Methanobrevibacter     | ermF<br>mefA<br>tet40<br>tetW                                           | MLS<br>MLS<br>tetracycline<br>tetracycline                                                   |
| Mycobacteroides abscessus      | Mycobacteroides        | tetC                                                                    | tetracycline                                                                                 |
| Phascolarctobacterium faecium  | Phascolarctobacterium  | aadE<br>tetQ<br>tetW                                                    | aminoglycoside<br>tetracycline<br>tetracycline                                               |
| Phocaeicola dorei              | Phocaeicola            | tetQ<br>tetW                                                            | tetracycline<br>tetracycline                                                                 |
| Phocaeicola vulgatus           | Phocaeicola            | ermF<br>tetQ<br>tetW                                                    | MLS<br>tetracycline<br>tetracycline                                                          |
| Pseudomonas aeruginosa         | Pseudomonas            | mexF                                                                    | multidrug                                                                                    |
| Pseudomonas lactis             | Pseudomonas            | mexE<br>mexF<br>mexT<br>oprN<br>arnA<br>abaQ<br>rpsD                    | multidrug<br>multidrug<br>multidrug<br>multidrug<br>polymyxin<br>quinolone<br>unclassified   |
| Pseudomonas sp. FDAARGOS_380   | Pseudomonas            | mexE<br>mexF                                                            | multidrug<br>multidrug                                                                       |

|                                 |                    |       |              |
|---------------------------------|--------------------|-------|--------------|
|                                 |                    | mexT  | multidrug    |
|                                 |                    | oprN  | multidrug    |
|                                 |                    | arnA  | polymyxin    |
|                                 |                    | abaQ  | quinolone    |
|                                 |                    | rpsD  | unclassified |
| Pseudomonas sp. J380            | Pseudomonas        | mexE  | multidrug    |
|                                 |                    | mexF  | multidrug    |
|                                 |                    | oprM  | multidrug    |
|                                 |                    | oprN  | multidrug    |
|                                 |                    | arnA  | polymyxin    |
|                                 |                    | abaQ  | quinolone    |
| Pseudomonas sp. R76             | Pseudomonas        | mexE  | multidrug    |
|                                 |                    | mexF  | multidrug    |
|                                 |                    | mexT  | multidrug    |
|                                 |                    | oprM  | multidrug    |
|                                 |                    | oprN  | multidrug    |
|                                 |                    | arnA  | polymyxin    |
|                                 |                    | abaQ  | quinolone    |
|                                 |                    | rpsD  | unclassified |
| Pseudomonas synxantha           | Pseudomonas        | mdtB  | multidrug    |
|                                 |                    | mexB  | multidrug    |
|                                 |                    | mexE  | multidrug    |
|                                 |                    | mexF  | multidrug    |
|                                 |                    | mexT  | multidrug    |
|                                 |                    | oprN  | multidrug    |
|                                 |                    | arnA  | polymyxin    |
|                                 |                    | abaQ  | quinolone    |
|                                 |                    | rpsD  | unclassified |
| Rhizobium oryzihabitans         | Rhizobium          | TEM-1 | beta-lactam  |
| [Ruminococcus] gnavus           | Mediterraneibacter | tetO  | tetracycline |
| Ruthenibacterium lactatiformans | Ruthenibacterium   | ermF  | MLS          |
|                                 |                    | mefA  | MLS          |
|                                 |                    | mdtP  | multidrug    |
|                                 |                    | tet40 | tetracycline |
|                                 |                    | tetQ  | tetracycline |
|                                 |                    | tetW  | tetracycline |
| Sphingomonas melonis            | Sphingomonas       | oprN  | multidrug    |
|                                 |                    | arnA  | polymyxin    |
|                                 |                    | abaQ  | quinolone    |
| Sphingomonas paucimobilis       | Sphingomonas       | mdtC  | multidrug    |
|                                 |                    | mexF  | multidrug    |
|                                 |                    | arnA  | polymyxin    |
|                                 |                    | abaQ  | quinolone    |
|                                 |                    | rpsD  | unclassified |
| Stenotrophomonas maltophilia    | Stenotrophomonas   | tetC  | tetracycline |

MLS: Macrolide-Lincosamide-Streptogramin
